# Supplementary material
Source: publisher figshare collection journal article supplement (https://acs.figshare.com/ndownloader/files/15006974)
Supplement: Supplementary file 1 [file 15006974]

# A Cluster Expansion Framework for the $\text{Sr}(\text{Ti}_{1-x}\text{Fe}_x)\text{O}_{3-x/2}$ ( $0 < x < 1$ ) Mixed Ionic Electronic Conductor: Properties based on Realistic Configurations

## SUPPORTING INFORMATION

Bin Ouyang<sup>1</sup>, Tanmoy Chakraborty<sup>2</sup>, Namhoon Kim<sup>3</sup>, Nicola H. Perry<sup>4,5</sup>, Tim Mueller<sup>6</sup>, Narayana R. Aluru<sup>1,2,3,5</sup>, Elif Ertekin<sup>1,3,5</sup>

1. National Center for Supercomputing Applications, University of Illinois at Urbana-Champaign, 1205 W Clark St, Urbana, Illinois 61801, USA
2. Beckman Institute for Advanced Science and Technology, University of Illinois at Urbana-Champaign, 405 N Mathews Ave, Urbana, Illinois 61801, USA
3. Department of Mechanical Science and Engineering, University of Illinois at Urbana-Champaign, 1206 W Green St, Urbana, Illinois 61801, USA
4. Department of Materials Science and Engineering and Materials Research Laboratory, University of Illinois at Urbana-Champaign, 1304 W Green St, Urbana, Illinois 61801, USA
5. International Institute for Carbon Neutral Energy Research (WPI-I2CNER), Kyushu University, 744 Motooka, Nishi-ku, Fukuoka 819-0395, Japan
6. Department of Materials Science and Engineering, Johns Hopkins University, 3400 N Charles St, Baltimore, Maryland 21218, USA

### Section 1. Cluster information and ECIs:

The total number of atomic sites in our supercells is 160. The cluster expansion built here is restricted to stoichiometries given by the reference composition  $\text{Sr}(\text{Ti}_{1-x}\text{Fe}_x)\text{O}_{3-x/2}$  for variable  $x$ . These considerations introduce constraints to the cluster sums present, resulting in a reduction in the independent set of clusters needed. For example, all dimer clusters are subject to the following constraints:

$$n_{\text{TiFe}} + n_{\text{TiTi}} = N_{\text{Ti}}^c n_{\text{Ti}} \quad (1)$$

$$n_{\text{TiFe}} + n_{\text{FeFe}} = N_{\text{Fe}}^c n_{\text{Fe}} \quad (2)$$

$$n_{\text{Ti}} + n_{\text{Fe}} = n_{\text{B-sites}} \quad (3)$$

where  $N_{\text{Ti}}^c$  and  $N_{\text{Fe}}^c$  are the number of sites that could form a dimer of a particular length with Ti and Fe sites respectively. With these three constraints applied, there remain only

two degrees of freedom amongst variables  $n_{\text{TiTi}}$ ,  $n_{\text{TiFe}}$ ,  $n_{\text{FeFe}}$ ,  $n_{\text{Ti}}$ , and  $n_{\text{Fe}}$ . That is to say, upon establishing the number of Ti atoms, and number of Ti-Fe dimers, the number of the remainder clusters are set due to the fixed composition.

Upon adoption of such constraints, the final set of clusters used in the cluster expansion are listed below in Table S1. These include 1 monomer, 8 dimers, 13 trimers and 4 tetramers. Within Table S1, the column labeled “cluster shape” refers to the length of all edges for the given cluster.

| Cluster Composition | Cluster Shape                   | ECI (eV)  |
|---------------------|---------------------------------|-----------|
| Constant part       | N/A                             | -321.5457 |
| Ti                  | Single Atom                     | -27.6898  |
| Ti-Fe               | (3.95)                          | -0.0286   |
| Ti-Fe               | (5.58)                          | -0.0017   |
| Ti-Fe               | (6.84)                          | -0.0175   |
| Ti-Fe               | (7.90)                          | 0.0120    |
| O-Vacancy           | (2.79)                          | -0.7514   |
| O-Vacancy           | (3.95)                          | 0.4188    |
| Fe-Vacancy          | (1.97)                          | -5.3952   |
| Fe-Vacancy          | (4.41)                          | -0.1099   |
| Ti-Fe-O             | (1.97,1.97,3.95)                | -0.0134   |
| Ti-Fe-O             | (1.97,3.95,5.92)                | -0.0192   |
| Ti-Fe-O             | (1.97,3.95,4.41)                | 0.0102    |
| Ti-Ti-Ti            | (3.95,3.95,5.58)                | 0.0166    |
| Ti-Ti-Ti            | (5.58,5.58,7.90)                | -0.0021   |
| Ti-Ti-Ti            | (3.98,5.58,6.84)                | -0.0059   |
| Ti-Ti-Ti            | (5.58,5.58,5.58)                | -0.0085   |
| O-O-Vac             | (2.79,2.79,2.79)                | 0.4339    |
| O-O-Vac             | (2.79,2.79,3.95)                | -0.2770   |
| O-O-Vac             | (2.79,2.79,5.58)                | 0.0166    |
| Fe-O-O              | (1.97,1.97,2.79)                | -0.9386   |
| Fe-O-O              | (1.97,1.97,3.95)                | -1.0370   |
| Fe-O-O              | (1.97,4.41,3.95)                | -0.0773   |
| Ti-Ti-Fe-Fe         | (3.95,5.58,3.95,3.95,5.58,3.95) | -0.0107   |
| Ti-Fe-Fe-Vac        | (3.95,5.58,1.97,3.95,1.97,4.41) | 0.0091    |
| Fe-O-Vac-Vac        | (1.97,1.97,1.97,2.79,2.79,2.79) | 0.5323    |
| O-O-Vac-Vac         | (2.79,2.79,3.95,2.79,2.79,2.79) | -0.2263   |

## Section 2: Determination of equilibrium configurations using probability configuration

To obtain the high temperature  $T = 1000$  K configurations, we first use Monte Carlo to generate a probability distribution of finding configurations of particular energies as shown in Fig. S1. Once the probability distribution has been established, a configuration from the peak of the spectrum is selected for further analysis.

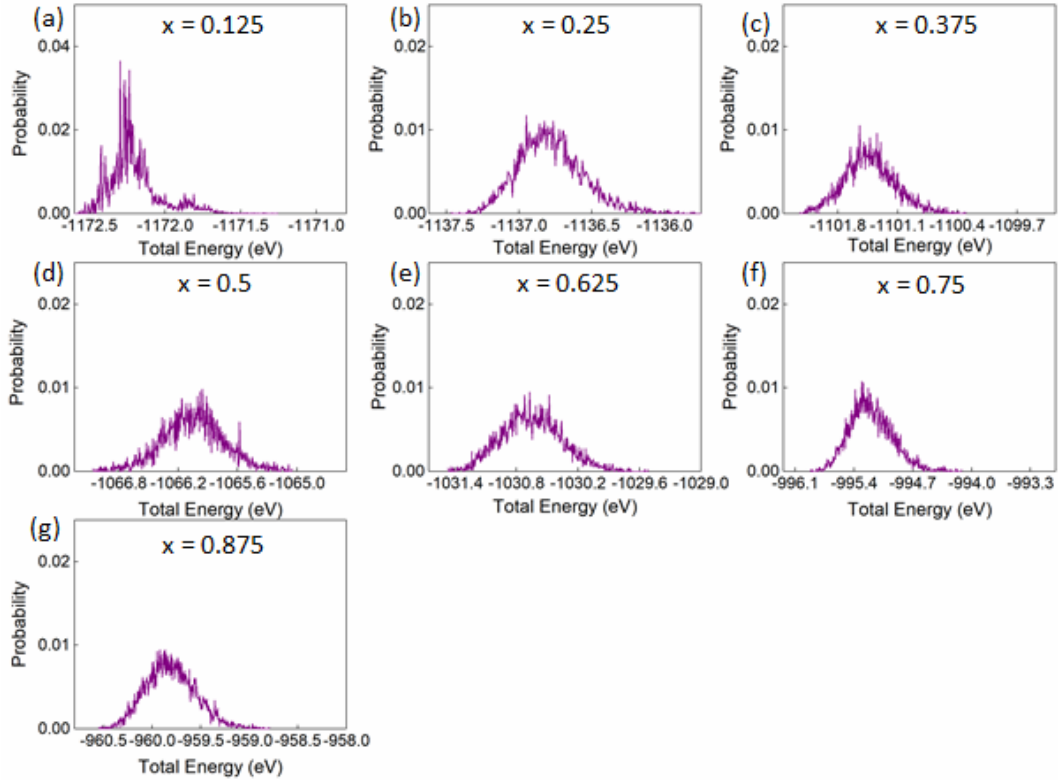

**Fig. S1:** Probability distribution from CEMC simulations for (a)  $x=0.125$ ; (b)  $x=0.25$ ; (c)  $x=0.375$ ; (d)  $x=0.5$ ; (e)  $x=0.625$ ; (f)  $x=0.75$ ; (g)  $x=0.875$ .

### Section 3: SQSs for different Fe composition with corresponding error correlation values

The values of the error correlation for different Fe compositions are tabulated below, and the corresponding generated SQS is also shown.

| Composition (x)   | 0.125  | 0.25   | 0.375  | 0.5    | 0.625  | 0.75   | 0.875  |
|-------------------|--------|--------|--------|--------|--------|--------|--------|
| Error correlation | 0.0634 | 0.0443 | 0.0363 | 0.0396 | 0.0427 | 0.0458 | 0.0492 |

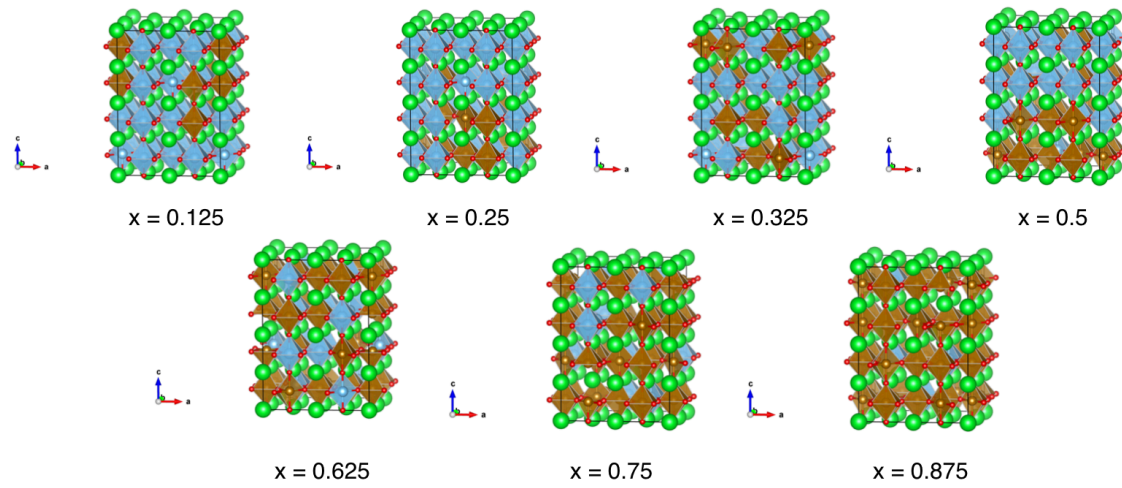

**Fig. S2:** SQSs of the  $\text{Sr}(\text{Ti}_{1-x}\text{Fe}_x)\text{O}_{3-x/2}$  for different Fe composition. The labeling of the different atoms is same as the original manuscript.
